# Supplementary material for: Enlargement of Gold Nanoparticles for Sensitive Immunochromatographic Diagnostics of Potato Brown Rot
Source: PubMed Central journal article supplement (PMC6338966; doi:10.3390/s19010153), 2019-01-04
Supplement: sensors-19-00153-s001.pdf [file sensors-19-00153-s001.pdf]

Electronic Supplementary Material

# Enlargement of Gold Nanoparticles for Sensitive Immunochromatographic Diagnostics of Potato Brown Rot

Shyatesa C. Razo <sup>1,2</sup>, Natalia A. Panferova <sup>1</sup>, Vasily G. Panferov <sup>1</sup>, Irina V. Safenkova <sup>1</sup>, Natalia V. Drenova <sup>3</sup>, Yuri A. Varitsev <sup>4</sup>, Anatoly V. Zherdev <sup>1</sup>, Elena N. Pakina <sup>2</sup> and Boris B. Dzantiev <sup>1,\*</sup>

<sup>1</sup> A.N. Bach Institute of Biochemistry, Research Centre of Biotechnology of the Russian Academy of Sciences, Leninsky Prospect 33, 119071 Moscow, Russia; kish218@gmail.com (S.C.R.); nemchenko.na@yandex.ru (N.A.P.); panferov-vg@mail.ru (V.G.P.); saf-iri@yandex.ru (I.V.S.); zherdev@inbi.ras.ru (A.V.Z.)

<sup>2</sup> Agricultural-Technological Institute, RUDN University, Miklukho-Maklaya Street 8/2, 117198 Moscow, Russia; e-pakina@yandex.ru

<sup>3</sup> All-Russian Plant Quarantine Centre, Pogranichnaya Street, 32, Bykovo-2, 140150 Moscow, Russia; drenova@mail.ru

<sup>4</sup> A.G. Lorch All-Russian Potato Research Institute, Lorch Street 23, Kraskovo, 140051 Moscow, Russia; varyuriy@yandex.ru

\* Correspondence: dzantiev@inbi.ras.ru; Tel.: +7-495-954-3142; Fax: +7-495-954-2804

Received: 23 November 2018; Accepted: 28 December 2018; Published: date

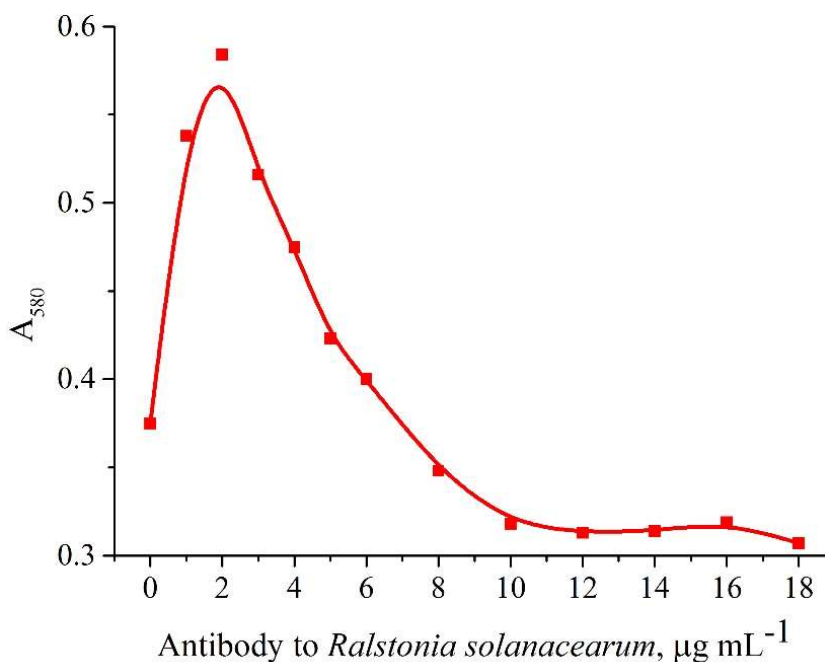

**Figure S1.** Flocculation curve for antibody to *Ralstonia solanacearum* and GNPs.

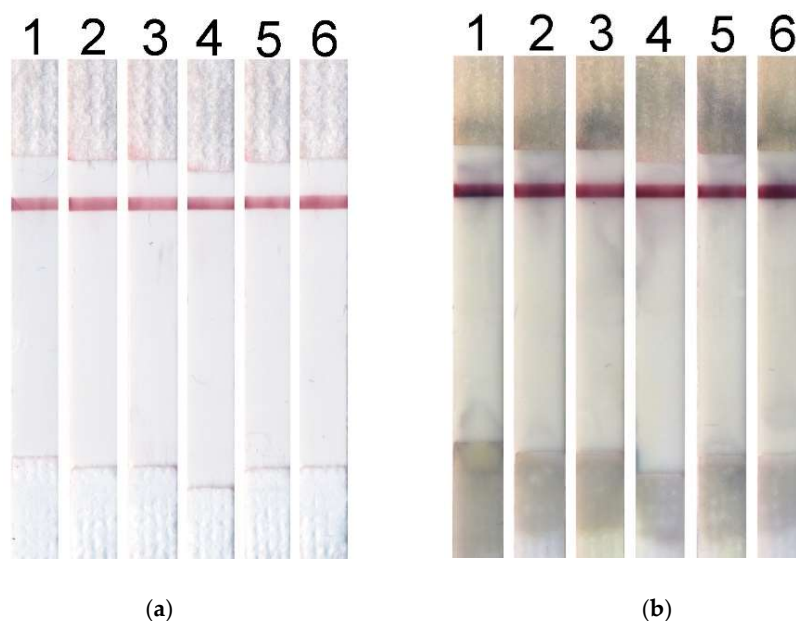

**Figure S2.** LFIA of non-specific bacteria. (a) Test strips before enlargement. (b) Test strips after enlargement. 1-*Clavibacter michiganensis* subsp. *sepedonicus*, 2-*Pectobacterium carotovorum*, 3-*Dickeya* sp., 4-*Clavibacter michiganensis* subsp. *michiganensis*, 5-*Artrobacter castelli*, 6-*Pseudomonas syringae*.

**Table S1.** Comparison of GNP enlargement based methods for highly sensitive assays.

| Assay                    | Analyte                                            | Enlargement Strategy                     | LOD Decrease       | Reference |
|--------------------------|----------------------------------------------------|------------------------------------------|--------------------|-----------|
| LFIA                     | Deoxynivalenol<br>fumonisin B1                     | Silver enhancement                       | 2-fold<br>2.5-fold | [1]       |
| LFIA                     | Prostate-specific antigen                          | Silver enhancement                       | 3-fold             | [2]       |
| LFIA                     | Cadmium                                            | Silver enhancement                       | 4-fold             | [3]       |
| LFIA                     | <i>Escherichia coli</i> O157:H7                    | Gold enhancement                         | 8-fold             | [4]       |
| Paper immunoassay        | <i>E. O157:H7</i><br><i>Salmonella typhimurium</i> | Gold enhancement                         | 10-fold            | [5]       |
| LFIA                     | Ochratoxin A                                       | Silver enhancement                       | 10-fold            | [6]       |
| LFIA                     | <i>Helicobacter pylori</i> antigens                | Silver enhancement                       | 10-fold            | [7]       |
| LFIA                     | Potato leafroll virus                              | Silver enhancement                       | 15-fold            | [8]       |
| Dot-blot immunoassay     | <i>Mycobacterium tuberculosis</i><br>antigen       | Silver enhancement<br>Copper enhancement | 4-fold<br>17-fold  | [9]       |
| LFIA                     | Abrin-a                                            | Silver enhancement                       | 100-fold           | [10]      |
| LFIA                     | Avian influenza virus<br>Newcastle disease virus   | Gold enhancement                         | 100-fold           | [11]      |
| Flow through immunoassay | Protein G                                          | Gold enhancement                         | 100-fold           | [12]      |
| LFIA                     | <i>Salmonella enteridis</i>                        | Gold enhancement                         | 100-fold           | [13]      |
| 3D paper based assay     | Human norovirus                                    | Gold enhancement                         | 100-fold           | [14]      |
| LFIA                     | Potato virus X                                     | Gold enhancement                         | 240-fold           | [15]      |

## References

1. Yu, Q.; Li, H.; Li, C.; Zhang, S.; Shen, J.; Wang, Z. Gold nanoparticles-based lateral flow immunoassay with silver staining for simultaneous detection of fumonisin B1 and deoxynivalenol. *Food Control* **2015**, *54*, 347–352, doi:10.1016/j.foodcont.2015.02.019.
2. Rodríguez, M.O.; Covián, L.B.; García, A.C.; Blanco-López, M.C. Silver and gold enhancement methods for lateral flow immunoassays. *Talanta* **2016**, *148*, 272–278, doi:10.1016/j.talanta.2015.10.068.
3. Xing, C.; Kuang, H.; Hao, C.; Liu, L.; Wang, L.; Xu, C. A silver enhanced and sensitive strip sensor for Cadmium detection. *Food Agr. Immunol.* **2014**, *25*, 287–300, doi:10.1080/09540105.2013.781140.
4. Wang, J.-Y.; Chen, M.-H.; Sheng, Z.-C.; Liu, D.-F.; Wu, S.-S.; Lai, W.-H. Development of colloidal gold immunochromatographic signal-amplifying system for ultrasensitive detection of *Escherichia coli* O157:H7 in milk. *RSC Adv.* **2015**, *5*, 62300–62305, doi: 10.1039/C5RA13279G.
5. Park, J.; Shin, J.H.; Park, J.-K. Pressed paper-based dipstick for detection of foodborne pathogens with multistep reactions. *Anal. Chem.* **2016**, *88*, 3781–3788, doi: 10.1021/acs.analchem.5b04743.
6. Anfossi, L.; Di Nardo, F.; Giovannoli, C.; Passini, C.; Baggiani, C. Increased sensitivity of lateral flow immunoassay for ochratoxin A through silver enhancement. *Anal. Bioanal. Chem.* **2013**, *405*, 9859–9867, doi:10.1007/s00216-013-7428-6.
7. Byzova, N.A.; Zherdev, A.V.; Sveshnikov, P.G.; Sadykhov, E.G.; Dzantiev, B.B. Development of an immunochromatographic test system for the detection of *Helicobacter pylori* antigens. *Appl. Biochem. Microbiol.* **2015**, *51*, 608–617, doi:10.1134/s000368381505004x.
8. Panferov, V.G.; Safenkova, I.V.; Byzova, N.A.; Varitsev, Y.A.; Zherdev, A.V.; Dzantiev, B.B. Silver-enhanced lateral flow immunoassay for highly-sensitive detection of potato leafroll virus. *Food Agr. Immunol.* **2018**, *29*, 445–457, doi:10.1080/09540105.2017.1401044.
9. Phan, L.M.T.; Rafique, R.; Baek, S.H.; Nguyen, T.P.; Park, K.Y.; Kim, E.B.; Kim, J.G.; Park, J.P.; Kailasa, S.K.; Kim, H.-J.; et al. Gold-copper nanoshell dot-blot immunoassay for naked-eye sensitive detection of tuberculosis specific CFP-10 antigen. *Biosens. Bioelectron.* **2018**, *121*, 111–117, doi: 10.1016/j.bios.2018.08.068.
10. Yang, W.; Li, X.-b.; Liu, G.-w.; Zhang, B.-b.; Zhang, Y.; Kong, T.; Tang, J.-j.; Li, D.-n.; Wang, Z. A colloidal gold probe-based silver enhancement immunochromatographic assay for the rapid detection of abrin-a. *Biosens. Bioelectron.* **2011**, *26*, 3710–3713, doi:10.1016/j.bios.2011.02.016.
11. Li, J.; Zou, M.; Chen, Y.; Xue, Q.; Zhang, F.; Li, B.; Wang, Y.; Qi, X.; Yang, Y. Gold immunochromatographic strips for enhanced detection of avian influenza and newcastle disease viruses. *Anal. Chim. Acta* **2013**, *782*, 54–58, doi: 10.1016/j.aca.2013.04.022.
12. Dias, J.T.; Svedberg, G.; Nystrand, M.; Andersson-Svahn, H.; Gantelius, J. Rapid signal enhancement method for nanoprobe-based biosensing. *Sci. Rep.* **2017**, *7*, 6837, doi:10.1038/s41598-017-07030-0.
13. Bu, T.; Huang, Q.; Yan, L.; Huang, L.; Zhang, M.; Yang, Q.; Yang, B.; Wang, J.; Zhang, D. Ultra technically-simple and sensitive detection for *Salmonella enteritidis* by immunochromatographic assay based on gold growth. *Food Control* **2018**, *84*, 536–543, doi: 10.1016/j.foodcont.2017.08.036.
14. Han, K.N.; Choi, J.-S.; Kwon, J. Three-dimensional paper-based slip device for one-step point-of-care testing. *Sci. Rep.* **2016**, *6*, 25710–25710, doi: 10.1038/srep25710.
15. Panferov, V.G.; Safenkova, I.V.; Zherdev, A.V.; Dzantiev, B.B. Post-assay growth of gold nanoparticles as a tool for highly sensitive lateral flow immunoassay application to the detection of potato virus X. *Microchim. Acta* **2018**, *185*, 506, doi:10.1007/s00604-018-3052-7.

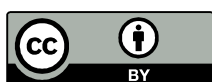

© 2018 by the authors. Submitted for possible open access publication under the terms and conditions of the Creative Commons Attribution (CC BY) license (<http://creativecommons.org/licenses/by/4.0/>).
